1 **Host dietary specialization and neutral assembly shape gut bacterial**  
2 **communities of wild dragonflies**

3

4 **Authors:** Rittik Deb<sup>1\*</sup>, Ashwin Nair<sup>1,2</sup>, Deepa Agashe<sup>1\*</sup>

5

6 **Affiliation:**

7 1. National Centre for Biological Sciences, TIFR, India

8 2. Shanmugha Arts, Science, Technology & Research Academy (SASTRA University),  
9 Thanjavur, India

10

11 \*Corresponding authors

12

13 **Contact information**

14 **Rittik Deb:** Address: National Centre for Biological Sciences, TIFR, GKVK Campus, Bellary  
15 Road, Bangalore 560065, India; Tel no. +91-80-2366-6507; Email: [rittikd@ncbs.res.in](mailto:rittikd@ncbs.res.in)

16 **Ashwin Nair:** Address: National Centre for Biological Sciences, TIFR, GKVK Campus, Bellary  
17 Road, Bangalore 560065, India; Tel no. +91-80-2366-6512; Email: [ashwinkn@ncbs.res.in](mailto:ashwinkn@ncbs.res.in)

18 **Deepa Agashe:** Address: National Centre for Biological Sciences, TIFR, GKVK Campus,  
19 Bellary Road, Bangalore 560065, India; Tel no: +91-80-2366-6524; Email:  
20 [dagashe@ncbs.res.in](mailto:dagashe@ncbs.res.in)

21 **ABSTRACT**

22 Host-associated gut microbial communities can have large impacts on host ecology and  
23 evolution, and are typically shaped by host taxonomy and diet. Different host species often  
24 harbor distinct microbial communities, potentially because (1) host dietary specialization  
25 determines microbial colonization, (2) host-specific selection acts on diet-acquired microbiota,  
26 and (3) a combination of both processes. While the first possibility involves passive  
27 community structuring, the other two may arise from a functional association and should  
28 produce stable microbial communities. However, these alternatives have rarely been tested in  
29 wild host populations. We used 16S rRNA amplicon sequencing to characterize the gut  
30 bacterial communities of six dragonfly species collected across multiple seasons and  
31 locations. We found that variation in bacterial community composition was predominantly  
32 explained by sampling season and location, and secondarily by host species. To distinguish  
33 the role of host dietary specialization and host-imposed selection, we used insect-specific  
34 primers to identify prey in the gut contents of three focal dragonfly species. We found that  
35 these dragonflies – considered to be generalist predators – consumed distinct prey, with  
36 seasonal diet variation. Together, the patterns of host dietary specialization and spatial and  
37 temporal variation suggest a strong role of passive processes in shaping the gut bacterial  
38 community. Indeed, the abundance and distribution of ~76% of the bacterial community  
39 members were consistent with neutral community assembly. Our results contradict the  
40 pervasive expectation that host-imposed selection shapes gut microbial communities, and  
41 highlight the importance of joint analyses of variation in host diet and gut microbial  
42 communities of natural host populations.

43

44

45 **KEYWORDS**

46 Community assembly, Gut microbiome, Diet, Specialist, Host-microbial interactions, Spatio-  
47 temporal variation

## 48 1. INTRODUCTION

49  
50 Extensive research in the past decade suggests that host-associated gut microbial communities  
51 can have large impacts on host evolution (Dillon & Dillon 2004; McFall-Ngai *et al.* 2013; Engel &  
52 Moran 2013). Hence, many studies have tried to understand the processes that determine the  
53 composition of gut microbiota (Dillon & Dillon 2004; Engel & Moran 2013). It is clear that the gut  
54 microbiome is affected by multiple factors including host genotype, environmental variation, and  
55 host diet. For example, in mice, knocking out single host genes had a remarkable effect on the  
56 gut microbial composition (as reviewed in Spor *et al.* 2011). Even between genetically closely  
57 related hosts, environmental variation can create a significant deviation in gut microbiota. For  
58 instance, when reared in distinct environments, pairs of human twins (Zoetendal & Akkermans  
59 2009; Nelson 2011; Kostic *et al.* 2013), mice siblings (Gootenberg & Turnbaugh 2011), and  
60 *Drosophila* populations reared on the same diet – all harbored distinct gut microbiota (Dillon &  
61 Dillon 2004; Charroux & Royet 2012; Broderick & Lemaitre 2012; Engel & Moran 2013).  
62 Similarly, variation in host diet may also have a large impact on gut microbial composition  
63 (Engel & Moran 2013), as observed in laboratory populations of mice, bees and flies maintained  
64 in an otherwise constant environment (Ley *et al.* 2008; Turnbaugh *et al.* 2009; Sharon *et al.*  
65 2011; Sullam *et al.* 2012; Moreira *et al.* 2012; Colman *et al.* 2012; Scott *et al.* 2013). However, it  
66 is not always clear whether these effects of host genotype, diet and environment reflect  
67 variation in the acquisition or the establishment step of microbial community assembly.

68  
69 In general, gut microbes are acquired from the mother or through the diet; and they may either  
70 colonize and proliferate in the gut, or fail to establish. At each step, various stochastic vs.  
71 deterministic, and neutral vs. selective processes determine community composition. For  
72 instance, a host may consistently acquire a specific set of microbes when they are maternally  
73 transmitted, or if the host is a dietary specialist. Within the host gut, microbial survival and  
74 growth dynamics may then be determined largely by stochastic neutral processes (e.g. based  
75 on initial abundance); or by deterministic and selective processes such as interactions with the  
76 host or with other microbes. Dietary specialists can maintain a specific gut microbial community  
77 by constantly reintroducing particular microbes, promoting specific metabolism, and maintaining  
78 a consistent gut environment (De Filippo *et al.* 2010; Nicholson *et al.* 2012). In contrast, a  
79 generalist host is more likely to stochastically sample a wider range of environmental microbes  
80 associated with its variable diet. For example, scavengers and omnivores tend to have richer  
81 gut communities (Yun *et al.* 2014; Yadav *et al.* 2015; Shukla *et al.* 2016); and we expect to find

82 a positive correlation between host diet diversity and gut microbial diversity (Engel & Moran  
83 2013; Yun *et al.* 2014). Given this disruptive effect of dietary variation, strong host-imposed  
84 selection should stabilize gut bacterial community composition, and minimize the impact of  
85 stochastic or deterministic events. Many prior studies have implicated host-imposed selection as  
86 a dominant force driving gut bacterial community composition (Spor *et al.* 2011; Engel & Moran  
87 2013; Antwis *et al.* 2017). For instance, host immune responses (Ley *et al.* 2006; Charroux &  
88 Royet 2012; Broderick & Lemaitre 2012; Quigley 2013) or a host-derived protected niche inside  
89 gut crypts (Dillon & Dillon 2004; Kikuchi *et al.* 2007; Engel & Moran 2013) can selectively allow  
90 only specific microbes to colonize the gut. Under weak selection, neutral processes such as  
91 ecological drift and microbial dispersal may strongly drive community assembly (Hubbell 2001;  
92 Rosindell *et al.* 2011), with each host's microbiota functioning as a local community interacting  
93 with the larger meta-community outside the host body (Costello *et al.* 2009, 2012).

94

95 Although the assembly and composition of gut bacterial communities is likely affected by all the  
96 processes described above, their relative importance in determining the composition and  
97 stability of gut bacterial communities of natural animal populations remains unclear. This gap in  
98 our understanding arises partly because most animal studies have focused on genetically  
99 homogeneous host populations reared on simple diets in controlled environments, such as  
100 laboratories or greenhouses (Engel & Moran 2013) (but see Corby-Harris *et al.* 2007; Osei-Poku  
101 *et al.* 2012; Adair *et al.* 2018). In contrast, in nature, most animals occupy diverse spatially and  
102 temporally separated niches, with substantial variation in the environment, genetics, behavior,  
103 and diet. All these factors can increase stochastic and/or deterministic variation in gut  
104 microbiota (Corby-Harris *et al.* 2007; Colman *et al.* 2012; Basset *et al.* 2012; Yun *et al.* 2014),  
105 opposing the stability introduced by host-imposed filters. Hence, it is important to ask whether  
106 host gut-microbe associations are truly stable in natural populations, and what factors determine  
107 the stability and composition of gut microbial communities.

108

109 In this context, we analyzed the gut bacterial and dietary community composition in natural  
110 populations of six dragonfly species, sampled from six different locations in India, across six  
111 months (three seasons) (Fig 1A, and Table S1). Dragonflies are generalist predators of aquatic  
112 and associated terrestrial ecosystems (Corbet 2004), and we, therefore, expected that they  
113 would consume diverse insect prey across locations, season, and host species. In turn, this  
114 dietary diversity should be associated with diverse gut microbial communities. Using models of  
115 prokaryotic community assembly, we could specifically test for neutral assembly of communities

116 (Sloan *et al.* 2006) and estimate the proportion of microbes that are assembled neutrally vs.  
117 through selection (Chase & Myers 2011). Previously, we found that the culturable fraction of gut  
118 bacterial communities of dragonflies varied significantly as a function of host species, location,  
119 and sampling time (Nair & Agashe 2016). Here, we built upon this work by sampling more  
120 dragonflies, identifying most gut-associated bacteria using 16S amplicon sequencing, and  
121 analyzing their diets by amplicon sequencing the cytochrome c oxidase 1 gene (COX1) from gut  
122 contents. Using these data, we quantified the spatial and temporal stability of host-associated  
123 gut bacteria; tested whether bacterial diversity was correlated with host diet diversity; and  
124 quantified the relative importance of neutral processes driving bacterial community assembly.

125

## 126 **2. MATERIALS AND METHODS**

### 127 **Sample collection and storage**

128 We collected six dragonfly species from six different sampling sites across India, through three  
129 seasons (winter: December – January, summer: March – April, monsoon: October – November)  
130 (Fig 1A and Table S1). We caught individuals using butterfly nets in open grounds, near natural  
131 water bodies, or waterlogged paddy fields. We conducted three separate rounds of sample  
132 collection as follows. (a) To determine the composition of gut bacterial communities, we surface  
133 sterilized each dragonfly using 70% alcohol and stored it in a 1x1 ft. mesh cage. Within 4-6  
134 hours of collection, we paralyzed dragonflies using a 4°C cold shock and dissected them in  
135 phosphate-buffered saline (PBS) using sterilized dissection tools. We stored dissected guts in  
136 1.5 ml centrifuge tubes containing 100% molecular grade alcohol. We stored the remaining  
137 dragonfly bodies separately in 100% alcohol for subsequent identification using an online  
138 resource (<http://indiabiodiversity.org/>). After bringing samples to the laboratory, we stored them  
139 at -20°C until further processing. For collections in Bordubi and Nagpur, we could not dissect  
140 dragonflies in the field and so we stored them in 100% alcohol immediately after capture. Note  
141 that our sampling was comprehensive across all host species and across locations for 3 host  
142 species (*O. pruinosum*, *O. sabina*, and *P. flavescens*); but we had limited sampling across  
143 seasons (Table S1) due to declined population size in dry conditions. (b) To estimate absolute  
144 gut bacterial abundance (using qPCR) and to localize bacteria in dragonfly guts (using FISH),  
145 we collected and isolated dragonflies in 50 ml Falcon tubes for 4-6 hours so that their guts  
146 would be empty. For dragonflies collected for qPCR, we dissected and stored guts in 100%  
147 alcohol. For FISH samples, we dissected the gut in PBS, divided each gut into three sections  
148 (foregut, midgut, and hindgut), and stored each section separately in 100% alcohol at -20°C. (c)  
149 To analyze dragonfly diet, we again collected three of the dragonflies used for gut bacterial

150 community analysis (*Orthetrum pruinosum*, *Orthetrum sabina* and *Pantala flavescens*) (Fig 1A,  
151 Table S1). We isolated individuals in 50 ml Falcon tubes for 4-6 hours to collect fecal matter,  
152 and then dissected them to separate gut contents (without host tissue). We stored gut contents  
153 and fecal material in separate centrifuge tubes in 100% alcohol at -20°C until further processing.  
154

### 155 **Amplicon sequencing to determine gut bacterial and diet composition**

156 We determined the gut bacterial community for a total of 48 dragonflies from different species,  
157 geographical locations and sampling seasons (Fig 1A, Table S1). We washed each gut sample  
158 thrice in fresh 100% molecular grade alcohol followed by three washes in PBS. We  
159 homogenized the tissue in liquid nitrogen using single-use sterile pestles and extracted DNA  
160 using the Wizard® Genomic DNA Purification Kit (Promega Corporations, Wisconsin, Madison,  
161 USA). We modified the manufacturer's protocol as follows: we added 600µl of nuclei lysis  
162 solution (10mM EDTA) per 100mg tissue and incubated first at 80°C for 20 min, and then at  
163 65°C for 30 min. We cooled the samples to 55°C, added 20mg/ml proteinase, and again  
164 incubated at 55°C for 3 hours. To precipitate degraded protein we added protein precipitation  
165 solution and left the sample on ice for 30 min. We centrifuged the lysate at 14000 g for 10 min  
166 and precipitated the supernatant with isopropanol. We washed the resulting pellet with 80%  
167 alcohol twice, then dried and suspended it in 40µl ultrapure nuclease-free water. We quantified  
168 DNA in a Nano-Drop (Nano-drop 2000, Thermo Fisher Scientific Inc., Wilmington, USA) and  
169 checked the integrity of the DNA by running 1µg on a 0.8% agarose gel. For each sample, we  
170 used 50 ng DNA to PCR-amplify the V3-V4 region of the bacterial 16S rRNA gene, using ExTaq  
171 (TaKaRa). The PCR primers contained tag sequences complementary to the Illumina  
172 sequencing adapter and index primers from the Nextera XT Index kit V2. We tested amplicons  
173 for quality and sequenced them (250 bp paired-end) on the Illumina MiSeq platform (Illumina,  
174 San Diego, CA, USA) using standard Illumina forward and reverse primers. Sequencing was  
175 performed by Genotypic Technology Pvt. Ltd., Bangalore, India.

176  
177 For host diet analysis, we implemented a previously described method that was used to  
178 estimate diet diversity in insectivorous bats (Zeale *et al.* 2011). In brief, we targeted the variable  
179 region of the COX1 gene – found in all insects – to estimate insect prey diversity from gut  
180 contents of captured dragonflies. A recent study by Kamenova and colleagues (2017) showed  
181 that prey DNA remains relatively intact inside the gut of a predatory carabid beetle (*Pterostichus*  
182 *melanarius*) for at least 3-5 days. Assuming a similar prey retention time in dragonfly guts, we  
183 thus expected that our analysis would reflect a 3-5 day snapshot of dietary diversity in each

184 dragonfly. We sampled a total of 45 dragonflies representing three geographical locations, three  
185 species, and two sampling seasons (Fig S1); as well as a phytophagous butterfly larva (*Hasora*  
186 sp.) as a control. We extracted dragonfly gut contents, removed the host tissue and then  
187 extracted DNA from gut contents using the Wizard® Genomic DNA Purification Kit (Promega  
188 Corporations, Wisconsin, Madison, USA) with the following modifications. We lysed cells at  
189 65°C in nuclei lysis solution with 10 mM EDTA, followed by an overnight proteinase K treatment.  
190 We precipitated DNA overnight at -20°C, suspended the final pellet in 20 µl nuclease-free water,  
191 and checked the concentration and integrity of the DNA. For further analysis, we chose samples  
192 showing intact bands on an agarose gel (n = 28 dragonflies, and 1 butterfly larva; Table S1). We  
193 designed custom primers – containing Illumina ITS barcodes for multiplexing – to target the  
194 COX1 variable region (using references from Zeale *et al.* 2011). The forward primer sequence  
195 was 5'TCGTCGGCAGCGTCAGATGTGTATAAGAGACAGAGATATTGGAACWTTATATTTTA  
196 TTTTGG3', and the reverse primer was 5'GTCTCGTGGGCTCGGAGATGTGTATAAGAGACA  
197 GWACTAATCAATTWCCAAATCCTCC3'. We used 200 ng DNA from each sample to amplify  
198 the target COX1 region with High Fidelity Phusion polymerase (Thermo scientific). We purified  
199 the samples using the Qiagen PCR purification Kit (Qiagen) and checked the product for  
200 amplicon size and concentration. We prepared sequencing libraries using the Nextera XT v2  
201 Index Kit (Illumina, U.S.A.) and sequenced them on the MiSeq platform (250 bp paired-end).  
202 Sequencing was performed by Genotypic Technology Pvt. Ltd., Bangalore, India.

203  
204 We processed amplicon sequencing data using QIIME version 1.9.1 (Caporaso *et al.* 2010).  
205 After demultiplexing and removing barcodes and primer sequences, we filtered and trimmed  
206 reads for sequence length and quality score (q>20) using default QIIME parameters. We used  
207 Fast-QC to check read quality and presence of barcodes or primers in the processed data.  
208 Finally, we paired the forward and reverse reads to generate a total of 30 million high quality  
209 paired-end reads for the 16S gene, with an average of 169,000 reads per sample (range:  
210 8,000–900,000). We classified these reads into Operational Taxonomic Units (OTUs) at the  
211 97% similarity level using the QIIME implementation of UCLUST using closed reference (only  
212 reference based) as well as open reference (reference based and denovo) algorithms. We used  
213 the GreenGenes 16S ribosomal gene database version gg\_13\_8 (DeSantis *et al.* 2006) to  
214 assign taxonomy to each representative OTU. We removed chimeric sequences using  
215 Chimeraslayer (Haas *et al.* 2011) and removed unassigned, chloroplast, and mitochondrial  
216 sequences to generate the final “.biom” files for all OTU picking methods. We normalized closed

217 referenced OTUs by bacterial 16S copy number using the software PICRUSt (Phylogenetic  
218 Investigation of Communities by Reconstruction of Unobserved States, version 1.0.0).

219  
220 For insect COX1 amplicons, we obtained a total of 2.1 million reads (average 70,000 and range  
221 29,000–115,000 reads per sample). Using QIIME, we picked OTUs at the 89% similarity level  
222 (as described in Hebert *et al.* 2003), and used the Barcode of Life Database v4 (Ratnasingham  
223 & Hebert 2007) to assign taxonomy to each OTU. We removed chimeric sequences from OTUs.  
224 We checked the precision of our sequencing and OTU assignment by examining our control  
225 sample (butterfly larva), where 97.4% of the reads were correctly classified to a single OTU  
226 assigned to *Hasora* sp without correcting for spurious OTUs. To remove host OTUs from each  
227 sample, we picked the Odonate OTU with the highest number of assigned reads and deleted it  
228 from the final table. We note that this elimination step would also remove potential cases of  
229 conspecific predation, which is known in some dragonflies (Corbet 2004).

230  
231 For microbiome as well as insect diet analysis, we removed potentially erroneous OTUs (as  
232 described in Huse *et al.* 2010) from our dataset by implementing three OTU filters, generating a  
233 smaller community in each case. 1) Pruned community: retaining all OTUs with at least 0.005%  
234 relative abundance across the entire dataset, to minimize impacts of sequencing errors  
235 (Bokulich *et al.* 2013); 2) Dominant community: retaining all OTUs with at least 5% relative  
236 abundance in at least one sample; 3) Minimally pruned community: retaining all OTUs with at  
237 least 20 reads per OTU per sample, to obtain a conservative estimate of OTUs with sufficient  
238 read support. We separately applied each filter to the full dataset and then recalculated the  
239 relative abundance of OTUs for subsequent analysis.

240  
241 **Statistical analysis**

242 We performed all statistical analysis in the R statistical software version 3.3.4 (R Core Team  
243 2013) using relevant packages as required. We considered each distinct OTU (gut bacteria:  
244 97% sequence similarity, eukaryotic prey: 89% sequence similarity) as the basic unit of  
245 comparison, regardless of taxonomic placement. To estimate the sampling depth at which  
246 community richness saturated, we performed rarefaction analysis with the Pruned Community.  
247 We assumed that this sampling depth would be sufficient to saturate the two other pruned  
248 communities, since a) the minimally pruned community had higher reads/sample, and b) the  
249 dominant community was a subset of the pruned community. We subsampled reads to simulate  
250 varying sampling depth (100-2500 reads per sample) and calculated Faith's phylogenetic



251 diversity (Faith's PD) at each depth. We plotted PD against the number of reads per sample to  
252 estimate the sampling depth at which PD saturated, as an indicator of sufficient sampling.

253  
254 We analyzed community structure (relative abundance of OTUs) across samples using Ward's  
255 hierarchical agglomerative clustering (Murtagh & Legendre 2014). We tested the impact of host  
256 species, location and season using permutational ANOVA (PERMANOVA, in the R package  
257 "Adonis" (Oksanen 2015)) with 10,000 permutations. We used the R package "Caret" (Kuhn  
258 2008) to remove near-zero variance in the data. To visualize clustering of samples based on  
259 their bacterial composition across treatments, we calculated Bray-Curtis distances between  
260 samples and performed Canonical Analysis of Principal Coordinates based on Discriminant  
261 Analysis (CAPdiscrim) using the R package "Biodiversity R" (Kindt & Kindt 2017). We tested the  
262 significance of clustering and estimated classification success by permuting the distance matrix  
263 1000 times. We plotted the two dominant linear discriminants (LD) to visualize data  
264 classification. For each cluster, we drew ellipses reflecting 95% confidence intervals using the  
265 function "Ordiellipse" in the R package "Vegan" (Dixon 2003; Oksanen *et al.* 2017).

266  
267 To estimate bacterial or prey OTU richness for each dragonfly sample, we converted the table  
268 with the relative abundance of each OTU to a presence-absence table. We also used the final  
269 ".biom" table to identify shared OTUs across samples, and to calculate OTU richness per  
270 sample,  $\alpha$  diversity (Shannon's diversity index, a measure of OTU richness and evenness per  
271 sample) and  $\beta_w$  diversity (a comprehensive measure of the number of unique OTUs per sample  
272 (Koleff *et al.* 2003)). We tested the effect of host species identity, sampling location and  
273 sampling month on OTU richness using a generalized linear model (GLM) with Poisson errors.

274

### 275 **Quantitative PCR to validate abundance of specific gut bacteria**

276 To estimate the abundance of eubacteria and *Wolbachia* (a prevalent insect-associated  
277 bacterial genus), we performed quantitative PCR (qPCR) on bacterial DNA extracted from 9  
278 dragonfly guts (three individuals each of *O. sabina*, *O. pruinosum* and *P. flavescens*). We used  
279 previously reported primers (Heddi *et al.* 1999): universal Eubacterial primers, forward 5'-  
280 AGAGTTTGATCATGGCTCAG-3' and reverse 5'-TACCTTGTTACGACTTCACC-3'; and  
281 *Wolbachia* specific primers, forward 5'-CGGGGGAAAAATTTATTGCT-3', reverse 5'-  
282 AGCTGTAATACAGAAAGTAAA-3'. To normalize bacterial abundance to host tissue, we used  
283 previously described Odonate-specific primers for the 28S gene (forward: 5'-  
284 ACCATGAAAGGTGTTGGTTG-3' and reverse: 5'-ATCTCCCTGCGAGAGGATTC-3') (Dijkstra

285 *et al.* 2014). All primer pairs had amplification efficiencies greater than 90%. We ran three sets  
286 of PCR for each sample (total 10  $\mu$ L reaction volume), using 10 ng of host gut DNA, 8  $\mu$ L SYBR  
287 green PCR master mix (Thermo Fisher Scientific, Wilmington USA), and the appropriate primers  
288 (200 nM each). We added reaction mixes in a 384 well microplate (Corning, New York, USA)  
289 and monitored amplification in a ViiA™ 7 Real-Time PCR System (Thermo Fisher Scientific,  
290 Wilmington USA) with the following cycle conditions: 95°C for 30 s, 40 cycles of 95°C for 60 s,  
291 56°C for 60 s, 72°C for 60 s, and extension at 72°C for 5 min. We calculated threshold cycle  
292 values ( $C_T$ ) for each sample. We used the  $C_T$  value of each host specific gene to estimate the  
293  $\Delta C_T$  values. Finally, we plotted these values for all the three host dragonflies for comparison.

294

### 295 **Testing models of bacterial community assembly in dragonfly guts**

296 If the gut community of a host is under weak selection, it is expected that it will be predominantly  
297 neutrally assembled. To test whether a neutral model of community assembly could explain the  
298 observed distribution of bacterial communities across hosts, we fitted a neutral distribution  
299 model (Sloan *et al.* 2006; Woodcock *et al.* 2007) to the bacterial communities observed in hosts  
300 from a specific location and season. The model is based on Hubbell's model of the neutral  
301 theory of biodiversity (Hubbell 2001) but is applicable to large communities, such as a complex  
302 microbial community. For model fitting, we followed the approach used by Burn *et al.* (2016).  
303 We considered that each individual dragonfly gut houses a local community with numerous  
304 bacterial species (OTUs) whose members are drawn from a larger metacommunity, comprised  
305 of bacteria present across all dragonfly individuals collected from a specific geographic location  
306 and season. The model uses the following parameters: (a) population size of each OTU in the  
307 local and metacommunity (estimated using the number of reads) (b) the relative abundance of  
308 each OTU. Using these, the model estimates the migration rate or dispersion probability ( $m$ ) for  
309 each OTU. In the event of an individual bacterium's death,  $m$  is the probability that it will be  
310 replaced via dispersal from the metacommunity, rather than reproduction within the local  
311 community. The relationship between the abundance of each OTU in the metacommunity and  
312 its occurrence across local communities is informative for understanding the processes driving  
313 community assembly (Sloan *et al.* 2006). Under neutral community assembly, a highly abundant  
314 OTU should occur in many hosts and fall within the 99% CI of the fitted line. If an OTU occurs at  
315 a higher frequency in a host than expected from its abundance in the metacommunity  
316 (comprised of OTUs from all hosts), this indicates positive selection for those bacteria  
317 (presumably by the host). Similarly, if an OTU is very abundant in the metacommunity but  
318 occurs in only a few host individuals, this indicates negative selection against the OTU.

319  
320 For each metacommunity derived from hosts sampled from a given location in a specific  
321 season, we fitted a  $\beta$ -distribution to the relationship between OTU occurrence and abundance  
322 (using the script published by Burns et. al. 2016). We checked the model fit using non-linear  
323 least squares in R, and estimated 99% confidence intervals (CI) around the fit using binomial  
324 proportions. We then compared the proportion of OTUs that were neutrally distributed across  
325 sites, seasons and hosts. We generated two sets of models: (1) for each dragonfly species  
326 sampled at a specific location and season (2) pooling all dragonfly species sampled in each  
327 location and season. The first set allowed us to infer patterns of gut bacterial community  
328 assembly for each dragonfly species; but with low sample sizes (Table S1). The second set  
329 allowed us to infer general patterns of gut bacterial assembly across dragonflies, with a larger  
330 sample size. Finally, we compared taxonomic diversity (Clarke & Warwick 1998; Fierer *et al.*  
331 2007; Morrow *et al.* 2015) between the groups of bacteria that were inferred to be neutrally  
332 distributed, or positively or negatively selected by hosts. If the hosts were selecting for a specific  
333 functional association (and this functionality is phylogenetically conserved in bacteria), we  
334 expected that bacterial OTUs experiencing positive host selection should have lower taxonomic  
335 diversity compared to neutrally assembled bacteria.

336

### 337 **Localizing bacteria in dragonfly guts**

338 We used fluorescent in-situ hybridization (FISH) to determine the location of bacteria inside  
339 dragonfly guts. We hypothesized that if there is a functional association between host and  
340 bacteria, bacterial cells should be housed in specific crypts or inside columnar cellular folds in  
341 the host gut (as reported in previous studies by Barrow *et al.* 1980; Fuller & Turvey 1971).  
342 However, if bacteria are transient or only associated with food particles, they should be easily  
343 washed off or would be found primarily in the inner lumen of the host gut. We performed FISH  
344 with three species of dragonflies (*O. sabina*, *O. pruinosum*, and *P. flavescens*; n = 5 per  
345 species), using bacteria-specific probes (universal eubacterial probe, [Alexa-488] 5'-  
346 GCTGCCTCCCGTAGGAGT-3' (Da Silva *et al.* 2015) and a *Wolbachia* specific probe, [ALEXA-  
347 647] 5'-CTTCTGTGAGTACCGTCATTATC-3' (Le Clec'h *et al.* 2013), obtained from Sigma-  
348 Aldrich-Merck, Missouri, USA) and DAPI (4', 6-diamidino-2-phenylindole) staining (to visualize  
349 host cell nuclei). We followed the COLOSS protocol  
350 (<http://www.coloss.org/2018/01/17/standard-methods-for-molecular-research-in-apis-mellifera/>)  
351 with a few modifications. Before the assay, we rehydrated guts and fixed them in Carnoy's  
352 fixative for 96 hours. To reduce autofluorescence, we used peroxide treatment for 72 hours and

353 replaced the water inside host tissues using absolute alcohol and xylene washes as per the  
354 COLOSS protocol. Finally, we embedded samples in liquid paraffin using plastic molds to create  
355 paraffin blocks. We sliced the blocks into 10  $\mu\text{m}$  transverse sections using a Leica manual  
356 microtome (Leica Microtome 2125 RTS, Wetzlar, Germany) using disposable blades (Low  
357 profile blade 819, Leica). For each species and each part of the gut (foregut, midgut and  
358 hindgut), we obtained 5 sections per probe for each of 5 individuals. We mounted sections on  
359 Fisherbrand Superfrost Plus microscope slides (Thermo Fisher Scientific, Wilmington, USA),  
360 and heated off the paraffin in an oven at 65°C. We washed with Xylene (three minute wash,  
361 thrice), absolute alcohol (three minute wash, thrice), and double-distilled water (once) before  
362 hybridization. We dissolved 0.5 $\mu\text{L}$  of fluorescent probes in 500 $\mu\text{L}$  hybridization buffer and  
363 stained gut tissue sections in a dark chamber for 8-10 hours at room temperature with the  
364 respective bacteria-specific probe. We then stained sections with DAPI for 20 min to visualize  
365 host cell nuclei. We applied DABCO-glycerol (antifade agent), sealed the sections with  
366 coverslips, and stored them at 4°C in the dark. We note that we lost many sections during the  
367 multiple washes, but we retained at least 2 sections/dragonfly/species/probe for final analysis.  
368 We imaged sections using a Zeiss 510 Meta confocal microscope (Carl Zeiss, Oberkochen,  
369 Germany). We analyzed images using Image-J software (Version 1.6.0-24, 64-bit version).

370

### 371 **3. RESULTS**

372

373 Initial rarefaction analysis revealed that our sampling depth was sufficient to determine the  
374 bacterial community composition in all but one sample, which we excluded from further analysis  
375 (Fig S1). We separately analyzed a total of six sets of bacterial communities, generated using  
376 either closed or open-reference OTU picking and implementing three OTU filtering thresholds:  
377 1) pruned community (576 OTUs open reference), 2) dominant community (59 OTUs open  
378 reference), and 3) minimally pruned community. All sets showed comparable results, but here  
379 we focus on the pruned and dominant open referenced sets unless mentioned otherwise.  
380 Corresponding results for other sets are given in the supplementary material.

381

382 We found an average of 188 OTUs per sample, which is over 2-fold higher than previous  
383 observations for other carnivorous insects including the order Odonata (Ley *et al.* 2008; Sullam  
384 *et al.* 2012; Jones *et al.* 2013; Yun *et al.* 2014). The dragonfly gut community was dominated by  
385 Proteobacteria (88%), Firmicutes (9.8%), Actinobacteria (1.8%) and Bacteroidetes (0.4%) (Figs  
386 1B & 1C). At the family level, Rickettsiaceae – comprising of three *Wolbachia* OTUs – were

387 most abundant, although this high abundance was limited to dragonflies from the genus  
388 *Orthetrum* (Fig 1D). In other host genera, especially *P. flavescens*, OTUs from the family  
389 Enterobacteriaceae were more abundant. Overall, we observed substantial variation in relative  
390 abundance of OTUs across individual hosts (Fig 1D).

391

### 392 **Host species, sampling season and location shape gut bacterial community composition**

393 A full analysis of the impact of host species, season and location showed that each of these  
394 factors had significant impacts on the dominant gut bacterial community (Table 1; see Table S2  
395 for other community sets). Linear discriminant analysis to visualize clustering supported the  
396 PERMANOVA analysis, showing strong separation in gut bacterial communities across host  
397 species, location, and season (Fig 2, and S2). An unconstrained PCoA analysis (Figs S3) also  
398 showed similar patterns, although as expected, classification ability was poorer than observed  
399 for constrained (CAPdiscrim) analysis (Fig 2). Interestingly, location and season together  
400 explained a larger proportion of variation in gut bacterial communities (24%; Table 1A)  
401 compared to host species alone (16%), suggesting that environmental factors might have a  
402 stronger impact on community composition. In fact, when we restricted our analysis to the three  
403 best-sampled host species, *O. sabina*, *O. pruinosum*, and *P. flavescens*, we found a relatively  
404 weak impact of host species (7% variation explained), relative to the combined effects of  
405 location and season (total 31% variation explained; 22% by location alone) (Table 1B, and S3).  
406 These patterns are also mirrored in the number of shared vs. unique bacterial taxa across  
407 various groups of dragonflies. Out of the 576 OTUs detected in total, all host species shared  
408 206 OTUs (~36%; Fig S4G). Interestingly, the congeneric dragonflies *O. pruinosum* and *O.*  
409 *sabina*, which harbored similar bacterial communities (Fig 2A), also shared the maximum  
410 number of bacterial OTUs (407 shared OTUs, ~71%, out of which 34 OTUs were unique to the  
411 genus *Orthetrum*; Fig S4G). Finally, 42% of the OTUs (241 out of 576) were shared across  
412 seasons (Fig S4H), and 25% (145 out of 576 OTUs) were shared across locations (Fig S4I).

413

414 Overall, the impacts of host species, location and season were not sensitive to omission of the  
415 two most abundant bacterial families Rickettsiaceae and Enterobacteriaceae (Figs S5A-B),  
416 indicating a robust bacterial community structure. Conversely, focusing only on these two  
417 bacterial families, we found slightly different results. The abundance of OTUs from the family  
418 Rickettsiaceae was influenced by both host species and sampling location (Table S4A), with  
419 high abundance in the genus *Orthetrum* (average 82%, Figs 1D and S6A; confirmed using  
420 qPCR, Fig S7) except for Bangalore samples (<1%) (Fig S6B). The abundance of

421 Enterobacteriaceae OTUs was influenced by host species (predominant in *P. flavescens*,  
422 average 70%) and sampling season (predominant during monsoon, average 42%) (Figs 1D and  
423 S6C-D; Table S4B). Finally, for each factor, classification analysis based on gut bacterial  
424 composition also categorized significant proportions of samples correctly into the respective  
425 groups (Tables S5A-C and S6A-C). These results show that host-specific and environmental  
426 factors together govern bacterial community structure, with the latter having larger impacts.

427  
428 Despite the significant effects of host species, location and season on overall community  
429 composition, these factors had relatively weak and variable impacts on the richness and  
430 diversity of bacterial communities. Across host species, location and season, bacterial  
431 communities had similar number of OTUs (Fig S8 A-C; Table S7A). Similarly, the  $\alpha$  diversity of  
432 communities (considering both OTU richness and evenness) varied only across host species  
433 (Fig S4A; Table S7B, and S8), but was invariable across sampling season and sites (Figs S4B-  
434 C; Table S7C). In contrast, all three factors (as well as an interaction between location and host  
435 species) significantly affected the  $\beta$  diversity of communities (Figs S4D-F; Table S7C), indicating  
436 significant community turnover across species, season and site. However, the impact of host  
437 species on  $\beta$  diversity was largely driven by the two *Orthetrum* species and *P. flavescens*, all of  
438 which had higher  $\beta$  diversity than the other three hosts (Fig S4D). Interestingly, dragonflies  
439 collected during the monsoons also showed greater  $\beta$  diversity (Fig S4E), suggesting an impact  
440 of rainfall on gut bacterial diversity.  $\beta$  diversity was also higher in sites from Southern India  
441 (Agumbe, Bangalore and Shendurney) compared to North Indian locations (Bordubi and  
442 Nagpur) (Figs S4F). However, the reasons for these differences in  $\beta$  diversity are not obvious:  
443 Agumbe, Shendurney and Bordubi are close to rainforests with relatively high biodiversity,  
444 whereas Nagpur and Bangalore are dry areas with relatively low biodiversity.

445  
446 **Dragonflies show host-specific and seasonal dietary specialization**

447 To test whether host-specific bacterial communities reflect host-specific diets, we next tested for  
448 dietary specialization across the three best-sampled dragonfly species, *O. pruinosum*, *O. sabina*  
449 and *P. flavescens*. After excluding putative host OTUs, the pruned prey community of both  
450 *Orthetrum* species had significantly higher richness compared to *P. flavescens* ( $P < 0.01$ , Chi-  
451 square=16.91, df=2, post-hoc Dunn test: OP vs. PF:  $P < 0.01$ , OS vs. PF:  $P < 0.01$ , OP vs OS:  
452  $P = 0.04$ ) as well as greater diversity ( $P = 0.01$  Kruskal Wallis' Chi-squared: 8.37, df=2, post-hoc  
453 Dunn test: OP vs. PF:  $P = 0.03$ , OS vs. PF:  $P < 0.01$ , OP vs OS:  $P = 0.26$ ) (Fig 3A). These patterns  
454 mirror the bacterial communities associated with these hosts (Fig 3A): *Orthetrum* had higher

455 bacterial diversity (Kruskal Wallis' Chi-squared: 7.39, df=2, P=0.02, post-hoc Dunn test: OP vs.  
456 PF: P=0.03, OS vs. PF: P=0.04, OP vs OS: P=0.69), though not significantly higher richness  
457 (Kruskal Wallis' Chi-squared: 1.99, df=2, P=0.3). These correlated differences in prey and gut  
458 bacterial communities indicate a potential link between the two.

459  
460 We also observed striking differences between the diets of the three dragonfly species, with the  
461 two congeneric *Orthetrum* species sharing more similar diets (Fig 3B, and S9, Table 2, Table  
462 S10). For *O. pruinosum* and *O. sabina*, the prey community was predominantly composed of  
463 Dipterans (83% and 68% respectively) (Fig S9), whereas *P. flavescens* consumed more  
464 Odonates (88% of prey OTUs) (Fig S9). We also observed that the diets of the two *Orthetrum*  
465 species changed across seasons (Table 2; Figs 3B and S10, Table S9). During the monsoon,  
466 individuals of both species had similar diets, but during the dry season, they had more dissimilar  
467 diets (Fig 3B and S10, Table S9). For *O. pruinosum*, diet  $\alpha$ -diversity and richness tended to  
468 increase during the monsoon (diversity: Welch t-test:  $t=-1.71$ ,  $df=7.31$ ,  $P=0.06$ ; richness: Welch  
469 t-test:  $t=-2.4$ ,  $df=7.66$ ,  $P=0.01$ ) (Fig S10), potentially due to increased availability of diverse  
470 insect prey after the rains. However, the diet diversity of *O. sabina* reduced during the monsoon  
471 (Mann-Whitney U test:  $W=21$ ,  $P=0.04$ , Fig S10), without any impact on dietary richness (Welch  
472 t-test:  $t=-0.05$ ,  $df=7.9$ ,  $P=0.5$ ). We found that during monsoon, diet evenness also decreased in  
473 *O. sabina* (Welch t-test:  $t=-1.71$ ,  $df=5.48$ ,  $P=0.07$ , marginally non-significant), whereas it  
474 remained unaltered in *O. pruinosum* (Welch t-test:  $t=-0.8$ ,  $df=6.01$ ,  $P=0.22$ ) (Fig S10). Note that  
475 we did not observe strong impacts of location on dragonfly diet (Table 2; no effect of location  
476 alone, and a marginally significant effect of interaction with host species). This potentially  
477 reflects our limited sampling: we could only sample from two very closely located sites (Agumbe  
478 and Kadhari), which have similar habitats and probably similar insect prey communities. Overall,  
479 these results suggest that (a) *O. sabina* is likely a specialized forager whose preferred prey are  
480 more abundant during monsoon (thus decreasing evenness and diversity without affecting  
481 richness) (b) *O. pruinosum* is a generalist predator whose prey base diversifies depending on  
482 prey availability and (c) *P. flavescens* is a specialized predator that predominantly targets other  
483 Odonates (Figs 3B, S9, and S10). These patterns are also consistent with the hypothesis that  
484 host- and season-specific gut bacterial communities of dragonflies may directly reflect the  
485 influence of the introduction of diet-specific bacteria into the insects' guts.

#### 486 **Dragonfly gut bacterial communities are predominantly neutrally assembled**

487 To specifically test the hypothesis that dragonfly gut bacterial communities are acquired  
488 passively through the diet – with relatively weak host imposed filters – we estimated the fraction

489 of the bacterial community whose occurrence and abundance across hosts was consistent with  
490 neutral vs. non-neutral assembly. Analyzing communities from all samples collected from a  
491 given location and season (regardless of host species), we found that a large fraction of  
492 bacterial OTUs are predicted to be neutrally assembled (mean  $76 \pm 0.09$  %; range; Figs 4A-B,  
493 and S11A-C); i.e. whose distribution across hosts matched expectations from a model  
494 simulating assembly via random OTU dispersal. The proportion of neutrally distributed gut  
495 bacteria was influenced by both location and sampling season, with no interaction between  
496 these two factors (Table 3A). Dragonflies from Bordubi had the highest proportion of neutrally  
497 assembled gut bacteria (83%; Figs 4A and S12C), whereas dragonflies from Nagpur had the  
498 lowest proportion (62%; Figs 4A and S12E). Hosts collected in the dry season had a higher  
499 proportion of neutrally assembled gut bacteria (84%) compared to the monsoon (71%) (Fig 4B),  
500 potentially reflecting fewer dietary options available during the dry season. This pattern was also  
501 reflected in Agumbe which was sampled comprehensively across both seasons (proportion of  
502 neutrally assembled community: monsoon: 67%, dry season: 85%). As expected, we observed  
503 reverse patterns for the relative fraction of OTUs whose distribution is consistent with positive  
504 selection (Table 3B, Figs 4C-D) or negative selection (Table 3C, Figs 4E-F). Interestingly,  
505 monsoon samples had higher proportions of bacteria under negative selection (Fig 4F),  
506 suggesting that despite a high influx of new bacteria during monsoon, many of these could not  
507 establish in the hosts, and had low abundance. Finally, pooling all OTUs predicted to be under  
508 positive selection (across locations and seasons), we found that the taxonomic diversity of these  
509 was either higher than or comparable to OTUs that were neutrally distributed or under negative  
510 selection (Fig S13). This result is inconsistent with the hypothesis that dragonflies impose strong  
511 positive selection favoring a specific, shared set of functionally important bacteria. Instead, the  
512 pattern of higher taxonomic diversity in positively selected bacteria is consistent with host-  
513 specific, seasonal or spatial variation in putatively beneficial bacteria.

514  
515 Since we had relatively low sample sizes for each dragonfly species in a given location and  
516 season ( $n=3$ ), we restricted our analysis (above) mainly to pooled results across all samples.  
517 However, we also attempted to investigate host species-specific patterns of gut bacterial  
518 community assembly (Fig S11). We found that both host species and location had a significant  
519 impact on the proportion of bacteria that are neutrally assembled ( $P<0.01$  in each case; Table  
520 S11A; Fig S11), but that season had no effect ( $P=0.2$ , Table S11A) (also see Table S11B for  
521 bacteria under positive selection). Interestingly, for the two *Orthetrum* species, the pattern of gut  
522 bacterial assembly across sampling seasons was concordant with the change in their diets. We



523 found that the proportion of neutrally assembled gut bacteria in *O. pruinosum* – a generalist  
524 predator – was higher during the monsoon (mean: 79%, median: 84%) than in dry season  
525 (mean & median: 70%) (Fig S14A). On the contrary, *O. sabina* – a relative specialist during the  
526 monsoon – showed an inverse pattern (monsoon: mean 70%, median 62%, dry: mean &  
527 median 77%; Figs S14A and B). However, it is important to be noted that we could not perform  
528 relevant statistical tests due to insufficient sample size. These patterns support the hypothesis  
529 that diet-driven neutral community assembly likely explains much of the variation that we  
530 observe in gut bacterial community structure in dragonflies.

531

### 532 **Bacterial cells rarely adhere inside dragonfly guts**

533 To test whether bacterial cells adhere to dragonfly guts or are housed in specialized structures,  
534 we dissected the guts of three species (*O. sabina*, *O. pruinosum*, and *P. flavescens*) and probed  
535 for bacteria using FISH (Fig 5). The gut lumen was lined with columnar folds of epithelial cells  
536 (Fig 5A); in case of a specific host-bacterial association, bacteria could adhere or be housed  
537 here. However, we did not find any eubacterial signal in the foregut (Fig 5B-D), indicating that  
538 bacteria were either absent or rare in this part of the gut. Since we did not find a signal with the  
539 general eubacterial probe, we did not test foregut sections with the *Wolbachia*-specific probe. In  
540 *P. flavescens*, only the eubacterial probe showed a positive signal inside columnar folds (5 of 5  
541 tested individuals; 3 with very small patches of bacteria) (Fig 5E and H), whereas *Wolbachia*  
542 was absent (Fig 5K and N), corroborating our amplicon sequencing results. The midgut and  
543 hindgut of both *Orthetrum* species were positive for eubacterial and *Wolbachia*-specific probes  
544 (Fig 5F, G, I, J, L, M, O, and P; all 5 tested individuals of each species), although the signal was  
545 generally weak and localized to a small cluster of bacteria found in the gaps between columnar  
546 cellular folds. Interesting exceptions were observed in two *O. sabina* individuals where  
547 *Wolbachia* appeared to be sequestered within a specific tissue structure (Fig 5L); the functional  
548 significance of this pattern requires further work. Overall, the lack of a predominant signal of gut  
549 colonization suggests at best a weak relationship with the host.

550

## 551 **4. DISCUSSION**

552

553 Host selection is generally considered to be a strong selective force shaping gut bacterial  
554 communities of animals (Colman *et al.* 2012; Engel & Moran 2013; Yun *et al.* 2014), and is  
555 expected to stabilize communities in the face of spatial and temporal variation. Here, we tested  
556 this prediction by analyzing host associated gut bacteria across spatially and temporally

557 separated populations of six dragonfly species. Our key results contrast multiple findings from  
558 prior work: (a) dragonfly bacterial communities are twice as rich and diverse as other  
559 carnivorous insects including Odonates (Ley *et al.* 2008; Sullam *et al.* 2012; Jones *et al.* 2013;  
560 Yun *et al.* 2014); (b) location and season together explain more variation in bacterial community  
561 composition than host species identity; (c) dragonflies have somewhat specialized diets that  
562 reflect patterns of variation in gut bacterial communities, and (d) the gut community is  
563 predominantly neutrally assembled, showing little signatures of the strong host selection  
564 reported for many other insects (Engel & Moran 2013; Yun *et al.* 2014). Thus, our work  
565 highlights the importance of analyzing gut microbial communities of natural host populations in  
566 the context of naturally observed variation in geography, season, and host taxonomy.

567

568 In conjunction with host-imposed selection, ecological variables such as geographic and  
569 seasonal variation are hypothesized to contribute to the assembly of unique gut bacterial  
570 communities across insect hosts (Hufeldt *et al.* 2010; Osei-Poku *et al.* 2012; Engel & Moran  
571 2013). Geographical variation is thought to be important because local bacterial diversity,  
572 environmental conditions, and host diet may all vary in space, and can potentially influence  
573 bacterial community composition (Dillon & Dillon 2004; Osei-Poku *et al.* 2012; Engel & Moran  
574 2013). For instance, a specific subset of environmental microbiota associated with diet can  
575 enter host guts (dispersal), and can change either passively (through drift-like processes) or  
576 through active selection (imposed by host immunity, within host environment, or other microbial  
577 taxa in the gut). In the absence of strong host selection for specific microbes, neutral processes  
578 may dominate and lead to distinct community structure across geographically isolated host  
579 populations. For instance, previous studies found significant geographical structure in well-  
580 studied species such as humans, flies, and bees (Corby-Harris *et al.* 2007; Turnbaugh *et al.*  
581 2009; Costello *et al.* 2009). Concordantly, our work reveals that the dragonfly gut bacterial  
582 community varies significantly across locations. Importantly, we find that community structure is  
583 not obviously affected by the geographical distance between sites. For instance, dragonflies of  
584 the same species collected from relatively close sites (Fig 1A) – Bangalore, Agumbe, and  
585 Shendurney – had distinct gut bacterial community composition, suggesting that a combination  
586 of multiple locally acting factors may drive the composition of site-specific gut bacterial  
587 communities. These factors may include specific environmental conditions (e.g. temperature,  
588 precipitation, and soil pH) that drive variation in environmental microbes; variation in insect prey  
589 communities driving differential dispersal into host guts; local host diet specialization; or site-  
590 specific variation in host imposed selection acting on similar environmental microbes.

591  
592 Apart from geographical variation, seasonal variation can also influence gut microbial  
593 community by altering the environmental bacterial composition, host physiology, and host diet  
594 (Dillon & Dillon 2004; Engel & Moran 2013). We found that dragonflies housed unique gut  
595 bacterial communities across seasons, showing higher  $\beta$  diversity during monsoon. This impact  
596 of rainfall may occur because rain can alter the presence or abundance of environmental  
597 bacteria and/or prey species. Although the impact of climatic shifts on microbes is debated  
598 (Fierer *et al.* 2007; Jones *et al.* 2013; Wei *et al.* 2014), it is likely that increased humidity in the  
599 monsoon is more conducive for microbial growth. Prior work shows that insect diversity (major  
600 prey of dragonflies) also responds rapidly to change in rainfall (Tauber *et al.* 1986; Pinheiro *et*  
601 *al.* 2002; Akorli *et al.* 2016), especially in the tropics. Since insects house host-specific  
602 microbiota (Dillon & Dillon 2004; Engel & Moran 2013; Yun *et al.* 2014), a shift in the prey base  
603 may thus directly or indirectly contribute to changes in the gut bacterial community of  
604 dragonflies. Because our sampling across seasons was limited, our results probably present a  
605 conservative estimate of seasonal variation in gut bacterial communities of dragonflies.

606  
607 Finally, our study revealed that each dragonfly host genus housed a distinct gut bacterial  
608 community irrespective of sampling season and location. Interestingly, both species from the  
609 genus *Orthetrum* shared a significant proportion of their gut community, which may suggest a  
610 role for phylogenetically conserved host level processes shaping the gut community. Host  
611 taxonomy is an important factor that structures gut microbiota through active or passive filters  
612 imposed by host morphology, physiology, development, immune function, social interactions or  
613 diet (Dillon & Dillon 2004; Sullam *et al.* 2012; Colman *et al.* 2012; Jones *et al.* 2013; Engel &  
614 Moran 2013; Aksoy *et al.* 2014; Yun *et al.* 2014). However, in our analysis, host taxonomy  
615 explained less variation in bacterial communities, compared to the combined impacts of location  
616 and season. For instance, despite significant host specificity, all dragonflies shared a substantial  
617 proportion (36%) of bacterial OTUs. Hence it was important to ask: what processes explain  
618 these patterns of partially shared components of gut microbiomes?

619  
620 Broadly speaking, host-specific gut microbiota may reflect host specific diets and/or host  
621 specific selective filters (Colman *et al.* 2012; Engel & Moran 2013). Unfortunately, information  
622 on dragonfly diet is scarce, because their rapid and unpredictable movement patterns make  
623 observations very difficult (Corbet 2004). Limited behavioral observations in natural and cultured  
624 populations suggest that dragonflies are generalists (Fraser 1933; Corbet 2004; Stoks &

625 Córdoba-Aguilar 2012). We used a molecular approach to identify recent insect prey in  
626 dragonfly guts, thus presenting the first precise understanding of dragonfly diet in natural  
627 conditions. Our results revealed that three common, sympatric dragonflies (*O. sabina*, *O.*  
628 *pruinatum*, and *P. flavescens*) consume distinct insect communities. Importantly, this dietary  
629 specialization was also reflected in their gut bacterial community composition; although we  
630 caution that our analysis shows a correlation, but not direct causation. The two *Orthetrum*  
631 species showed a degree of dietary overlap, comparable to the overlap in their gut bacterial  
632 communities; whereas *P. flavescens* was unique both with respect to its diet and its gut  
633 bacterial community. Both *Orthetrum* species had a diverse prey base with ~40 OTUs, most  
634 belonging to the order Diptera. In contrast, *P. flavescens* consumed less than 10 OTUs that  
635 were predominantly comprised of Odonates. These findings were supported by behavioral  
636 observational data (Fraser 1933; Corbet 2004) and our own unpublished data, where *Orthetrum*  
637 *spp.* were observed to prey on flies and mosquitoes and *P. flavescens* was found to predate on  
638 other dragonflies. These dietary differences were also reflected in the diversity and richness of  
639 gut bacteria, strongly suggesting a direct association between dietary and gut bacterial diversity.  
640 Similar patterns have been documented in other insects where diet plays a key role in gut  
641 microbe composition (Colman *et al.* 2012; Engel & Moran 2013).

642  
643 Our results for the two *Orthetrum* species suggest that dietary specialization may also explain  
644 seasonal variation in dragonfly bacterial communities. The dietary overlap between these  
645 species arose primarily from similar diets during the rains; whereas their diet differed during the  
646 dry season. We speculate that *O. pruinatum* is a more generalist species, consuming more  
647 diverse and abundant prey as they become available during the monsoon, leaving prey  
648 community evenness unperturbed. On the other hand, *O. sabina* appears to be a seasonal  
649 specialist, consuming a smaller subset of more abundant prey during monsoons, leading to a  
650 decrease in prey diversity and evenness but maintaining similar prey richness as in the dry  
651 season. Thus, each dragonfly species may have a unique dietary niche that acts as a passive  
652 filter modulating the entry of environmental microbiota into the gut. Although this hypothesis  
653 requires further validation, we suggest that such dietary specialization – rather than strong host  
654 selection – is the primary driver of variation in dragonfly gut bacterial communities. Indeed,  
655 simulations using Sloan's neutral assembly model (2006) revealed that bacterial communities  
656 were predominantly neutrally assembled. Although such modeling has only rarely been used, its  
657 application to laboratory-reared zebrafishes (Burns *et al.* 2016) and wild *Drosophila* populations  
658 (Adair *et al.* 2018) revealed largely neutrally assembled gut microbiota. In our analysis, the gut

659 bacterial assembly also varied across location and season, with stronger signatures of neutral  
660 assembly during the dry season (summer and winter). This is expected in relative dietary  
661 specialists such as *O. sabina*, where limited prey options during the dry season should reduce  
662 specialization, leading to stronger effects of neutral processes. Thus, in the monsoon, the  
663 probability of bacterial dispersal from the metacommunity to the local community would  
664 decrease, making the local gut community of *O. sabina* more distinct from the larger  
665 metacommunity. In contrast, for a generalist host such as *O. pruinosum*, the proportion of  
666 neutrally assembled gut bacteria increased with increasing prey diversity during monsoon.

667  
668 Finally, two other lines of evidence support our conclusion that dragonfly gut bacterial  
669 communities are largely structured via passive processes. First, the high taxonomic diversity of  
670 “selected” bacterial OTUs suggest the lack of preference for a specific set of phylogenetically  
671 conserved functional traits. Second, FISH with eubacterial probes failed to show strong  
672 signatures of bacteria adhering to gut walls or enclosed in specific structures, indicating a weak  
673 association with hosts. Interestingly, we observed two cases where *Wolbachia* was found inside  
674 globular sacks or crypts in *O. sabina* individuals. Such structures – thought to provide a  
675 conducive environment for bacterial proliferation – were previously reported in insect hosts with  
676 a strong association with specific microbes (Dillon & Dillon 2004; Engel & Moran 2013). Prior  
677 studies examining the association between *Wolbachia* and *Drosophila* host found that the  
678 presence of *Wolbachia* prevented further infection in hosts (Hedges *et al.* 2008; Osborne *et al.*  
679 2012). Thus, the association between *O. sabina* and *Wolbachia* suggested by our analysis  
680 deserves further attention as a possible special case of strong dragonfly-bacterial interactions.

## 681 682 **Conclusions**

683 Our analysis of patterns of spatial, temporal and host-specific variation in the diet and gut  
684 bacterial communities of multiple wild-collected dragonflies highlights two key points. First, we  
685 suggest that environmental factors that may alter bacterial community stability should be given  
686 more importance while drawing general conclusions about host-microbe interactions. Second,  
687 while explaining variation in microbial community composition, it is important to explicitly  
688 consider neutral processes along with selection. We acknowledge that our sampling effort to  
689 understand gut bacterial diversity across seasons and locations was limited. However, despite  
690 this limitation, we found considerable variation (across season and location) in our study which  
691 is likely to increase with greater sampling effort. Hence our study provides a conservative  
692 estimate of the natural variation present across populations of predatory dragonflies. Moreover,

693 in our subsampled data with the three well sampled dragonflies we found consistent pattern. We  
694 hope that our work encourages further analysis of variation in gut microbiomes of natural insect  
695 populations, as well as experimental tests of the role of neutral vs. selective processes in the  
696 assembly of host-associated microbial communities.

697

#### 698 **DATA ACCESSIBILITY**

699 All data and custom code will be made available in public repositories. Sequencing data and  
700 metadata will be available on the ENA website. OTU tables (.txt files) will be uploaded in  
701 Figshare. Custom R scripts for analysis will be available on GitHub.

702

#### 703 **ACKNOWLEDGMENTS**

704 We thank Agashe lab members for critically reading the manuscript. We thank Krushnamegh  
705 Kunte for contributing samples from Shendurney Wildlife Sanctuary (permit no. WL 10-  
706 3781/2012 dated 18/12/2012, and GO (RT) No. 376/2012/F and WLD dated 26/07/2012);  
707 Agumbe Rainforest Research Station, Rohini Balakrishnan, and Sarita and Ramanuj Dasgupta  
708 for logistical support; Ashish Tiple, Krushnamegh Kunte, Kruttika Phalnikar, Manjunatha Reddy,  
709 Ronita Mukherjee, Sudhakar Gowda and Saira Guha for field assistance; Shantanu Joshi for  
710 help with identifying dragonflies; and Kruttika Phalnikar for help with QIIME analysis. We  
711 acknowledge funding and support from the National Centre for Biological Sciences and the  
712 Department of Science and Technology, India (INSPIRE Faculty award IFA-13 LSBM-64 to DA).

713

#### 714 **AUTHOR CONTRIBUTIONS**

715 RD: analyzed Miseq data; designed work, collected and prepared samples, and analyzed data  
716 for diet, FISH and qPCR experiments; carried out community assembly analysis; prepared  
717 figures and drafted the manuscript. AN: collected and prepared samples for gut bacterial  
718 analysis. DA: conceived the study; designed experiments; collected samples; acquired funding;  
719 wrote the manuscript.

720 **BIBLIOGRAPHY**

- 721 Adair KL, Wilson M, Bost A, Douglas AE (2018) Microbial community assembly in wild  
722 populations of the fruit fly *Drosophila melanogaster*. *The ISME Journal*, **12**, 959–972.
- 723 Akorli J, Gendrin M, Pels NAP *et al.* (2016) Seasonality and Locality Affect the Diversity of  
724 *Anopheles gambiae* and *Anopheles coluzzii* Midgut Microbiota from Ghana. *Plos One*,  
725 **11**, e0157529.
- 726 Aksoy E, Telleria EL, Echodu R *et al.* (2014) Analysis of multiple tsetse fly populations in  
727 Uganda reveals limited diversity and species-specific gut microbiota. *Applied and*  
728 *Environmental Microbiology*, **80**, 4301–4312.
- 729 Antwis RE, Griffiths SM, Harrison XA *et al.* (2017) Fifty important research questions in  
730 microbial ecology. *FEMS Microbiology Ecology*, **93**.
- 731 Barrow PA, Brooker BE, Fuller R, Newport MJ (1980) The attachment of bacteria to the gastric  
732 epithelium of the pig and its importance in the microecology of the intestine. *The Journal*  
733 *of applied bacteriology*, **48**, 147–154.
- 734 Basset Y, Cizek L, Cuénoud P *et al.* (2012) Arthropod diversity in a tropical forest. *Science*, **338**,  
735 1481–1484.
- 736 Bokulich NA, Subramanian S, Faith JJ *et al.* (2013) Quality-filtering vastly improves diversity  
737 estimates from Illumina amplicon sequencing. *Nature Methods*, **10**, 57–59.
- 738 Broderick NA, Lemaitre B (2012) Gut-associated microbes of *Drosophila melanogaster*. *Gut*  
739 *microbes*, **3**, 307–321.
- 740 Burns AR, Stephens WZ, Stagaman K *et al.* (2016) Contribution of neutral processes to the  
741 assembly of gut microbial communities in the zebrafish over host development. *The*  
742 *ISME Journal*, **10**, 655–664.
- 743 Caporaso JG, Kuczynski J, Stombaugh J *et al.* (2010) QIIME allows analysis of high-throughput  
744 community sequencing data. *Nature Methods*, **7**, 335–336.
- 745 Charroux B, Royet J (2012) Gut-microbiota interactions in non-mammals: what can we learn  
746 from *Drosophila*? *Seminars in Immunology*, **24**, 17–24.
- 747 Chase JM, Myers JA (2011) Disentangling the importance of ecological niches from stochastic  
748 processes across scales. *Philosophical Transactions of the Royal Society of London.*  
749 *Series B, Biological Sciences*, **366**, 2351–2363.
- 750 Clarke KR, Warwick RM (1998) A taxonomic distinctness index and its statistical properties.  
751 *Journal of Applied Ecology*, **35**, 523–531.
- 752 Le Clec'h W, Chevalier FD, Genty L *et al.* (2013) Cannibalism and predation as paths for  
753 horizontal passage of *Wolbachia* between terrestrial isopods. *Plos One*, **8**, e60232.
- 754 Colman DR, Toolson EC, Takacs-Vesbach CD (2012) Do diet and taxonomy influence insect  
755 gut bacterial communities? *Molecular Ecology*, **21**, 5124–5137.
- 756 Corbet PS (2004) *Dragonflies: behaviour and ecology of Odonata*. Harley Books.

- 757 Corby-Harris V, Pontaroli AC, Shimkets LJ *et al.* (2007) Geographical distribution and diversity  
758 of bacteria associated with natural populations of *Drosophila melanogaster*. *Applied and*  
759 *Environmental Microbiology*, **73**, 3470–3479.
- 760 Costello EK, Lauber CL, Hamady M *et al.* (2009) Bacterial community variation in human body  
761 habitats across space and time. *Science*, **326**, 1694–1697.
- 762 Costello EK, Stagaman K, Dethlefsen L, Bohannan BJM, Relman DA (2012) The application of  
763 ecological theory toward an understanding of the human microbiome. *Science*, **336**,  
764 1255–1262.
- 765 DeSantis TZ, Hugenholtz P, Larsen N *et al.* (2006) Greengenes, a chimera-checked 16S rRNA  
766 gene database and workbench compatible with ARB. *Applied and Environmental*  
767 *Microbiology*, **72**, 5069–5072.
- 768 Dijkstra KDB, Kalkman VJ, Dow RA, *et al.* (2014) Redefining the damselfly families: a  
769 comprehensive molecular phylogeny of Zygoptera (Odonata). *Systematic entomology*,  
770 **39**, 68–96.
- 771 Dillon RJ, Dillon VM (2004) The gut bacteria of insects: nonpathogenic interactions. *Annual*  
772 *Review of Entomology*, **49**, 71–92.
- 773 Dixon P (2003) VEGAN, a package of R functions for community ecology. *Journal of vegetation*  
774 *science : official organ of the International Association for Vegetation Science*, **14**, 927.
- 775 Engel P, Moran NA (2013) The gut microbiota of insects - diversity in structure and function.  
776 *FEMS Microbiology Reviews*, **37**, 699–735.
- 777 Fierer N, Bradford MA, Jackson RB (2007) Toward an ecological classification of soil bacteria.  
778 *Ecology*, **88**, 1354–1364.
- 779 De Filippo C, Cavalieri D, Di Paola M *et al.* (2010) Impact of diet in shaping gut microbiota  
780 revealed by a comparative study in children from Europe and rural Africa. *Proceedings*  
781 *of the National Academy of Sciences of the United States of America*, **107**, 14691–  
782 14696.
- 783 Fraser FC (1933) *The Fauna of British India, Including Ceylon and Burma: Arthropoda:*  
784 *Odonata*. British government in India, Taylor and Francis of London.
- 785 Fuller R, Turvey A (1971) [Bacteria associated with the intestinal wall of the fowl (*Gallus*  
786 *domesticus*)]. *The Journal of applied bacteriology*, **34**, 617–622.
- 787 Gootenberg DB, Turnbaugh PJ (2011) Companion animals symposium: humanized animal  
788 models of the microbiome. *Journal of Animal Science*, **89**, 1531–1537.
- 789 Haas BJ, Gevers D, Earl AM *et al.* (2011) Chimeric 16S rRNA sequence formation and  
790 detection in Sanger and 454-pyrosequenced PCR amplicons. *Genome Research*, **21**,  
791 494–504.
- 792 Hebert PDN, Ratnasingham S, deWaard JR (2003) Barcoding animal life: cytochrome c oxidase  
793 subunit 1 divergences among closely related species. *Proceedings. Biological Sciences /*  
794 *the Royal Society*, **270 Suppl 1**, S96–9.



- 795 Heddi A, Grenier AM, Khatchadourian C, Charles H, Nardon P (1999) Four intracellular  
796 genomes direct weevil biology: nuclear, mitochondrial, principal endosymbiont, and  
797 Wolbachia. *Proceedings of the National Academy of Sciences of the United States of*  
798 *America*, **96**, 6814–6819.
- 799 Hedges LM, Brownlie JC, O'Neill SL, Johnson KN (2008) Wolbachia and virus protection in  
800 insects. *Science*, **322**, 702.
- 801 Hubbell SP (2001) *The Unified Neutral Theory of Biodiversity and Biogeography*. Princeton  
802 University Press, USA.
- 803 Hufeldt MR, Nielsen DS, Vogensen FK, Midtvedt T, Hansen AK (2010) Variation in the gut  
804 microbiota of laboratory mice is related to both genetic and environmental factors.  
805 *Comparative Medicine*, **60**, 336–347.
- 806 Huse SM, Welch DM, Morrison HG, Sogin ML (2010) Ironing out the wrinkles in the rare  
807 biosphere through improved OTU clustering. *Environmental Microbiology*, **12**, 1889–  
808 1898.
- 809 Jones RT, Sanchez LG, Fierer N (2013) A cross-taxon analysis of insect-associated bacterial  
810 diversity. *Plos One*, **8**, e61218.
- 811 Kamenova S, Mayer R, Coissac E, Plantegenest M, Traugott M (2017) Comparing three types  
812 of dietary samples for prey DNA decay in an insect generalist predator. *BioRxiv*.
- 813 Kikuchi Y, Hosokawa T, Fukatsu T (2007) Insect-microbe mutualism without vertical  
814 transmission: a stinkbug acquires a beneficial gut symbiont from the environment every  
815 generation. *Applied and Environmental Microbiology*, **73**, 4308–4316.
- 816 Kindt R, Kindt MR (2017) Package ' ' BiodiversityR.
- 817 Koleff P, Gaston KJ, Lennon JJ (2003) Measuring beta diversity for presence-absence data.  
818 *Journal of Animal Ecology*, **72**, 367–382.
- 819 Kostic AD, Howitt MR, Garrett WS (2013) Exploring host-microbiota interactions in animal  
820 models and humans. *Genes & Development*, **27**, 701–718.
- 821 Kuhn M (2008) Caret package. *Journal of statistical software*, **28**, 1–26.
- 822 Ley RE, Hamady M, Lozupone C *et al.* (2008) Evolution of mammals and their gut microbes.  
823 *Science*, **320**, 1647–1651.
- 824 Ley RE, Peterson DA, Gordon JI (2006) Ecological and evolutionary forces shaping microbial  
825 diversity in the human intestine. *Cell*, **124**, 837–848.
- 826 Livak KJ, Schmittgen TD (2001) Analysis of relative gene expression data using real-time  
827 quantitative PCR and the 2<sup>-</sup>ΔΔCT method. *Methods*, **25**, 402–408.
- 828 McFall-Ngai M, Hadfield MG, Bosch TCG *et al.* (2013) Animals in a bacterial world, a new  
829 imperative for the life sciences. *Proceedings of the National Academy of Sciences of the*  
830 *United States of America*, **110**, 3229–3236.

- 831 Moreira APB, Texeira TFS, Ferreira AB, Peluzio M do CG, Alfenas R de CG (2012) Influence of  
832 a high-fat diet on gut microbiota, intestinal permeability and metabolic endotoxaemia.  
833 *The British Journal of Nutrition*, **108**, 801–809.
- 834 Morrow JL, Frommer M, Shearman DCA, Riegler M (2015) The Microbiome of Field-Caught and  
835 Laboratory-Adapted Australian Tephritid Fruit Fly Species with Different Host Plant Use  
836 and Specialisation. *Microbial Ecology*, **70**, 498–508.
- 837 Murtagh F, Legendre P (2014) Ward's Hierarchical Agglomerative Clustering Method: Which  
838 Algorithms Implement Ward's Criterion? *Journal of Classification*, **31**, 274–295.
- 839 Nair A, Agashe D (2016) Host-specific spatial and temporal variation in culturable gut bacterial  
840 communities of dragonflies. *Current science*, **110**, 1513–1523.
- 841 Nelson KE (Ed.) (2011) *Metagenomics of the human body*. Springer New York, New York, NY.
- 842 Nicholson JK, Holmes E, Kinross J *et al.* (2012) Host-gut microbiota metabolic interactions.  
843 *Science*, **336**, 1262–1267.
- 844 Oksanen J (2015) *Vegan: an introduction to ordination*.
- 845 Oksanen J, Blanchet FG, Friendly M *et al.* (2017) *Vegan: Community Ecology Package. R*  
846 *Package, Version 2.4-4*.
- 847 Osborne SE, Iturbe-Ormaetxe I, Brownlie JC, O'Neill SL, Johnson KN (2012) Antiviral protection  
848 and the importance of Wolbachia density and tissue tropism in *Drosophila simulans*.  
849 *Applied and Environmental Microbiology*, **78**, 6922–6929.
- 850 Osei-Poku J, Mbogo CM, Palmer WJ, Jiggins FM (2012) Deep sequencing reveals extensive  
851 variation in the gut microbiota of wild mosquitoes from Kenya. *Molecular Ecology*, **21**,  
852 5138–5150.
- 853 Pinheiro F, Diniz IR, Coelho D, *et al.* (2002) Seasonal pattern of insect abundance in the  
854 Brazilian cerrado. *Austral Ecology*, **27**, 132–136.
- 855 Quigley EMM (2013) Gut bacteria in health and disease. *Gastroenterology & hepatology*, **9**,  
856 560–569.
- 857 R Core Team (2013) *R: A language and environment for statistical computing*. R Foundation for  
858 Statistical Computing, Vienna, Austria.
- 859 Ratnasingham S, Hebert PDN (2007) bold: The Barcode of Life Data System  
860 (<http://www.barcodinglife.org>). *Molecular ecology notes*, **7**, 355–364.
- 861 Rosindell J, Hubbell SP, Etienne RS (2011) The unified neutral theory of biodiversity and  
862 biogeography at age ten. *Trends in Ecology & Evolution*, **26**, 340–348.
- 863 Scott KP, Gratz SW, Sheridan PO, Flint HJ, Duncan SH (2013) The influence of diet on the gut  
864 microbiota. *Pharmacological Research*, **69**, 52–60.
- 865 Sharon G, Segal D, Zilber-Rosenberg I, Rosenberg E (2011) Symbiotic bacteria are responsible  
866 for diet-induced mating preference in *Drosophila melanogaster*, providing support for the  
867 hologenome concept of evolution. *Gut microbes*, **2**, 190–192.

- 868 Shukla SP, Sanders JG, Byrne MJ, Pierce NE (2016) Gut microbiota of dung beetles  
869 correspond to dietary specializations of adults and larvae. *Molecular Ecology*, **25**, 6092–  
870 6106.
- 871 Da Silva S, Robbe-Masselot C, Raymond A *et al.* (2015) Spatial Localization and Binding of the  
872 Probiotic *Lactobacillus farciminis* to the Rat Intestinal Mucosa: Influence of Chronic  
873 Stress. *Plos One*, **10**, e0136048.
- 874 Sloan WT, Lunn M, Woodcock S *et al.* (2006) Quantifying the roles of immigration and chance  
875 in shaping prokaryote community structure. *Environmental Microbiology*, **8**, 732–740.
- 876 Spor A, Koren O, Ley R (2011) Unravelling the effects of the environment and host genotype on  
877 the gut microbiome. *Nature Reviews. Microbiology*, **9**, 279–290.
- 878 Stoks R, Córdoba-Aguilar A (2012) Evolutionary ecology of Odonata: a complex life cycle  
879 perspective. *Annual Review of Entomology*, **57**, 249–265.
- 880 Sullam KE, Essinger SD, Lozupone CA *et al.* (2012) Environmental and ecological factors that  
881 shape the gut bacterial communities of fish: a meta-analysis. *Molecular Ecology*, **21**,  
882 3363–3378.
- 883 Tauber MJ, Tauber CA, Masaki S (1986) *Seasonal adaptations of insects*. Oxford University  
884 Press.
- 885 Turnbaugh PJ, Ridaura VK, Faith JJ *et al.* (2009) The effect of diet on the human gut  
886 microbiome: a metagenomic analysis in humanized gnotobiotic mice. *Science*  
887 *Translational Medicine*, **1**, 6ra14.
- 888 Wei T, Ishida R, Miyanaga K, Tanji Y (2014) Seasonal variations in bacterial communities and  
889 antibiotic-resistant strains associated with green bottle flies (Diptera: Calliphoridae).  
890 *Applied Microbiology and Biotechnology*, **98**, 4197–4208.
- 891 Woodcock S, van der Gast CJ, Bell T *et al.* (2007) Neutral assembly of bacterial communities.  
892 *FEMS Microbiology Ecology*, **62**, 171–180.
- 893 Yadav KK, Bora A, Datta S *et al.* (2015) Molecular characterization of midgut microbiota of  
894 *Aedes albopictus* and *Aedes aegypti* from Arunachal Pradesh, India. *Parasites &*  
895 *vectors*, **8**, 641.
- 896 Yun J-H, Roh SW, Whon TW *et al.* (2014) Insect gut bacterial diversity determined by  
897 environmental habitat, diet, developmental stage, and phylogeny of host. *Applied and*  
898 *Environmental Microbiology*, **80**, 5254–5264.
- 899 Zeale MRK, Butlin RK, Barker GLA, Lees DC, Jones G (2011) Taxon-specific PCR for DNA  
900 barcoding arthropod prey in bat faeces. *Molecular ecology resources*, **11**, 236–244.
- 901 Zoetendal EG, Akkermans ADL (2009) The host genotype affects the bacterial community in the  
902 human gastrointestinal tract. *Journal Microbial Ecology in Health and Disease*, **13**,  
903 129–134.
- 904

905 **TABLES**

906

907 **Table 1.** Results of a permutational analysis of variation (PERMANOVA) showing the effect of  
 908 host species, location, and sampling season on gut bacterial composition (open referenced  
 909 dominant bacterial community) (A) across all six dragonfly hosts, and (B) across the three best-  
 910 sampled dragonfly hosts (*Orthetrum pruinosum*, *Orthetrum sabina*, and *Pantala flavescens*).  
 911

| (A)                             | Df | SSq.  | Mean SSq. | F stat | R <sup>2</sup> | P         |
|---------------------------------|----|-------|-----------|--------|----------------|-----------|
| Species                         | 5  | 3.01  | 0.60      | 1.92   | 0.16           | 0.0004    |
| Location                        | 4  | 2.81  | 0.70      | 2.24   | 0.15           | 0.0003    |
| Season                          | 2  | 1.83  | 0.91      | 2.91   | 0.09           | 9.999e-05 |
| Interaction (Species, Location) | 3  | 1.64  | 0.55      | 1.74   | 0.08           | 0.006     |
| Residuals                       | 32 | 10.05 | 0.31      |        | 0.52           |           |
| Total                           | 46 | 19.34 |           |        | 1              |           |
| (B)                             | Df | SSq.  | Mean SSq. | F stat | R <sup>2</sup> | P         |
| Species                         | 2  | 0.98  | 0.49      | 1.76   | 0.07           | 0.042     |
| Location                        | 4  | 3.20  | 0.80      | 2.88   | 0.22           | 4e-05     |
| Season                          | 2  | 1.41  | 0.70      | 2.54   | 0.09           | 0.003     |
| Interaction (Species, Location) | 3  | 1.42  | 0.47      | 1.70   | 0.10           | 0.03      |
| Residuals                       | 27 | 7.51  | 0.28      |        | 0.52           |           |
| Total                           | 38 | 14.5  |           |        | 1              |           |

912

913

914 **Table 2.** Results of a permutational analysis of variation (PERMANOVA) showing the effect of  
 915 host species, location, and season on the diet of *Orthetrum pruinosum*, *Orthetrum sabina*, and  
 916 *Pantala flavescens*.

917

|                                 | Df | SSq. | Mean SSq. | F stat | R <sup>2</sup> | P        |
|---------------------------------|----|------|-----------|--------|----------------|----------|
| Species                         | 2  | 2.97 | 1.48      | 9.53   | 0.36           | 9.00E-05 |
| Location                        | 1  | 0.21 | 0.21      | 1.38   | 0.027          | 0.2      |
| Season                          | 2  | 1.15 | 0.57      | 3.69   | 0.14           | 4.00E-04 |
| Interaction (Species, season)   | 1  | 0.44 | 0.44      | 2.85   | 0.05           | 0.021    |
| Interaction (Species, location) | 1  | 0.31 | 0.31      | 2.03   | 0.04           | 0.056    |
| Residuals                       | 20 | 3.11 | 0.155     |        | 0.37           |          |
| Total                           | 27 | 8.21 |           |        | 1              |          |

918

919

920

921 **Table 3.** Results of GLMs (Generalized linear models) testing the effect of location and season  
 922 on the proportion of dragonfly gut bacterial community that is (A) neutrally assembled (B) under  
 923 positive selection and (C) under purifying selection.

924

| (A)      | Df | Deviance | Residual deviance | Deviance | P         |
|----------|----|----------|-------------------|----------|-----------|
| Null     |    |          | 5                 | 52.5     |           |
| Location | 4  | 27.07    | 1                 | 25.5     | 1.919e-05 |
| Season   | 1  | 25.5     | 0                 | 0        | 4.370e-07 |
| (B)      | Df | Deviance | Residual deviance | Deviance | P         |
| Null     |    |          | 5                 | 49.68    |           |
| Location | 4  | 44.33    | 1                 | 5.34     | 5.476e-09 |
| Season   | 1  | 5.34     | 0                 | 0        | 0.03      |
| (C)      | Df | Deviance | Residual deviance | Deviance | P         |
| Null     |    |          | 5                 | 83.8     |           |
| Location | 4  | 59.1     | 1                 | 24.7     | 4.49e-12  |
| Season   | 1  | 24.7     | 0                 | 0        | 6.67e-07  |

925

926 **FIGURES**

927

928 **Figure 1:** (A) Map of India showing dragonfly sampling locations, and representative images of  
 929 the sampled dragonfly species. Sampling details are given in Table S1. Major bacterial phyla (B)  
 930 and classes (C) in the dominant gut bacterial communities of sampled dragonflies. (D) Heat  
 931 map showing dominant bacterial OTUs across all dragonfly samples. Each column indicates a  
 932 host individual (sorted by species), and rows indicate dominant bacterial OTUs clustered based  
 933 on their abundance across hosts.

934

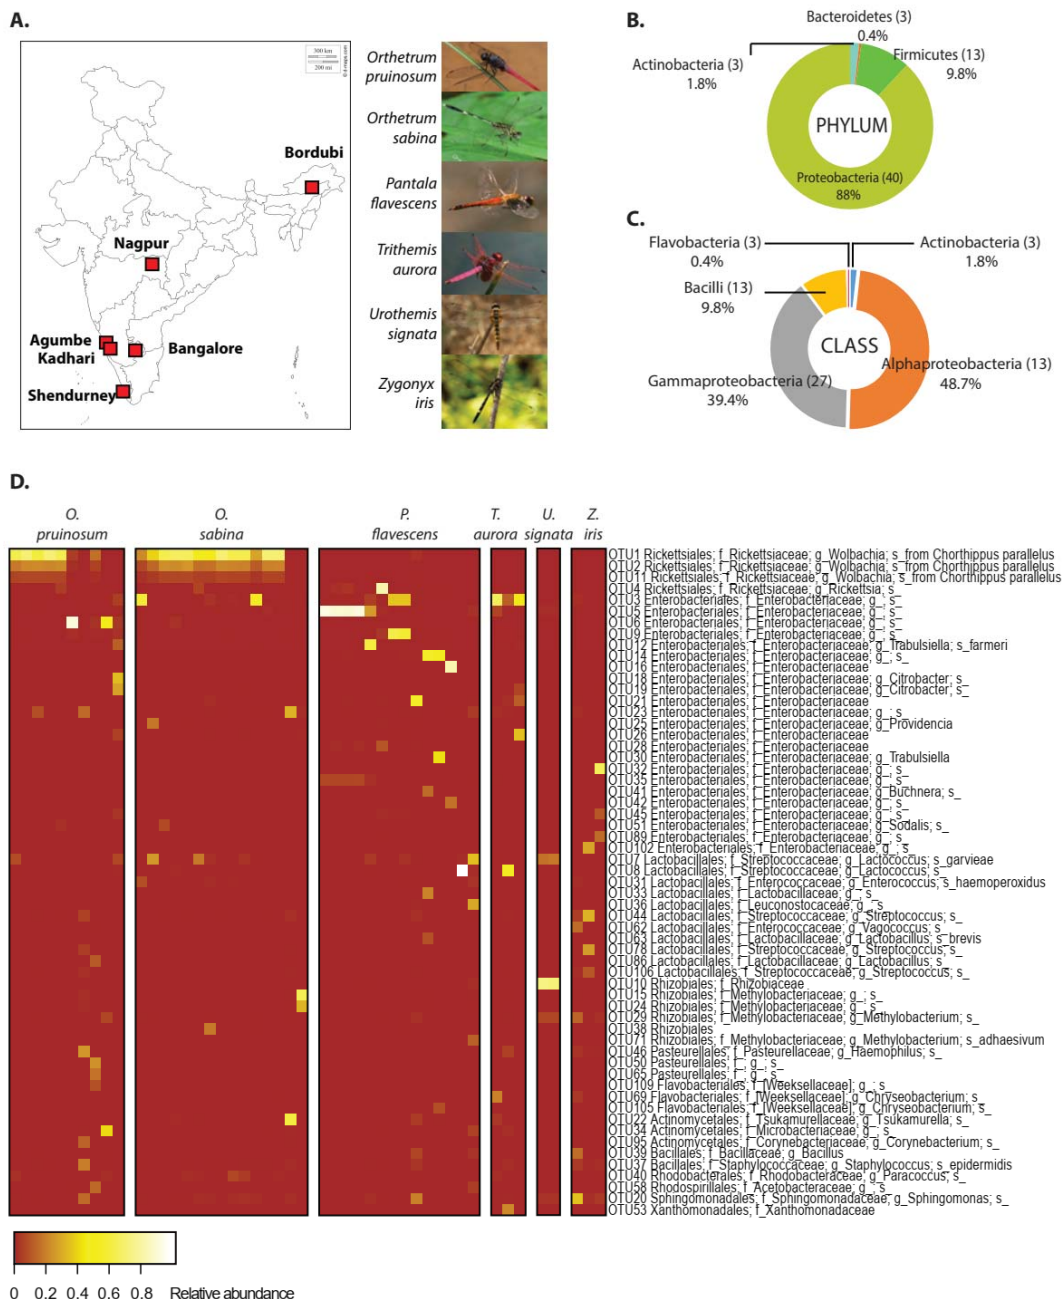

935 **Figure 2:** Linear discriminant (LD) plots  
936 showing two dominant linear discriminants  
937 (LD) that group dragonfly samples based  
938 on their gut bacterial community  
939 composition (based on Bray-Curtis  
940 distance and open reference OTU  
941 picking). Percentage of variance  
942 explained by each LD is indicated in  
943 parentheses. Each point represents a host  
944 individual. Ellipsoids represent 95%  
945 confidence intervals around each group  
946 mean, calculated from LD values.  
947 Clustering of dragonfly samples based on  
948 (A) host species identity (B) sampling  
949 season (C) sampling location.

950  
951

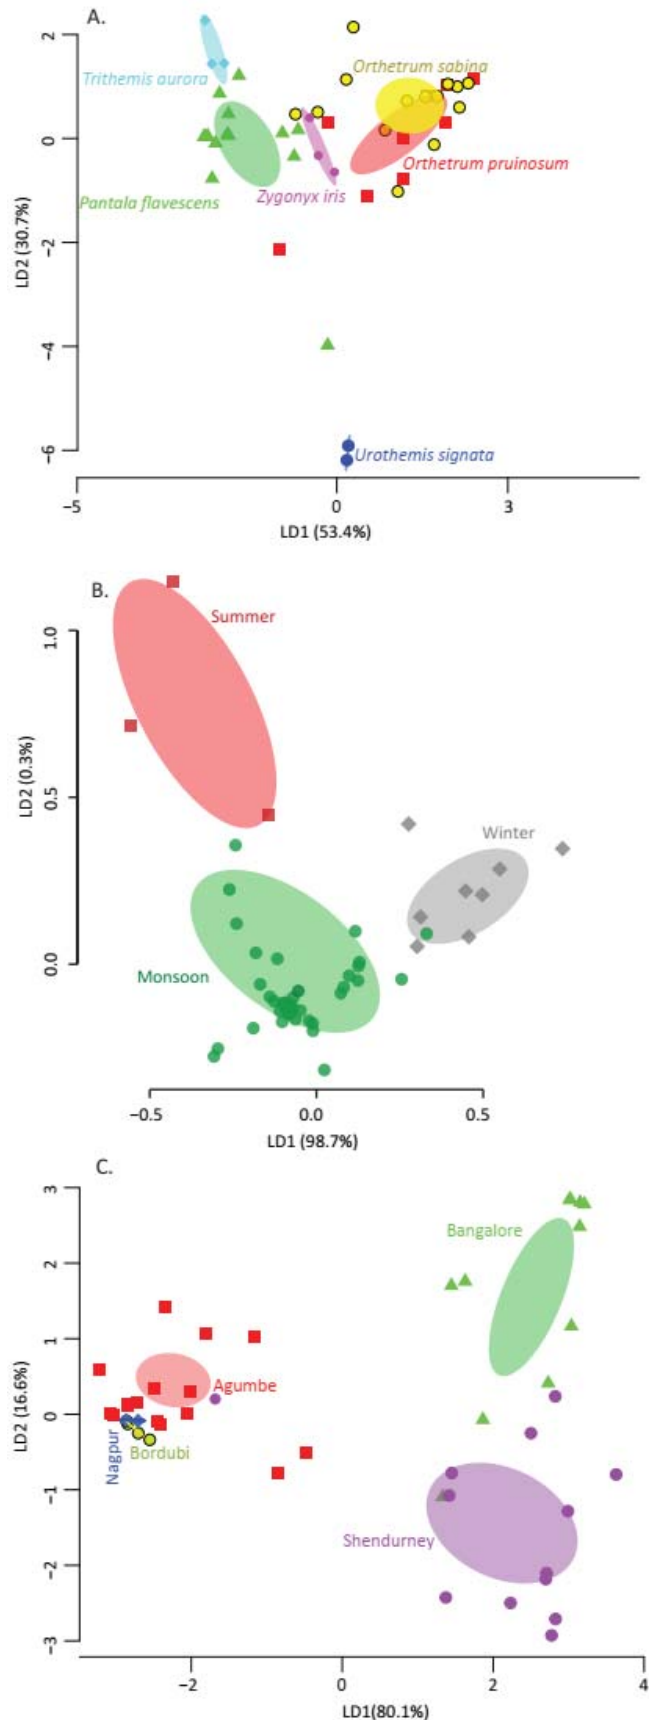

952 **Figure 3:** (A) Boxplots show OTU richness and diversity of bacterial and prey communities of  
953 three dragonfly species (*Orthetrum pruinosum*, *Orthetrum sabina* and *Pantala flavescens*).  
954 Asterisks indicate significant differences in OTU diversity or richness (Kruskal Wallis test). (B)  
955 Clustering of dragonfly samples based on dietary composition using LD analysis, as described  
956 in Fig 2. Representative images of dominant prey taxa are shown for each dragonfly species.

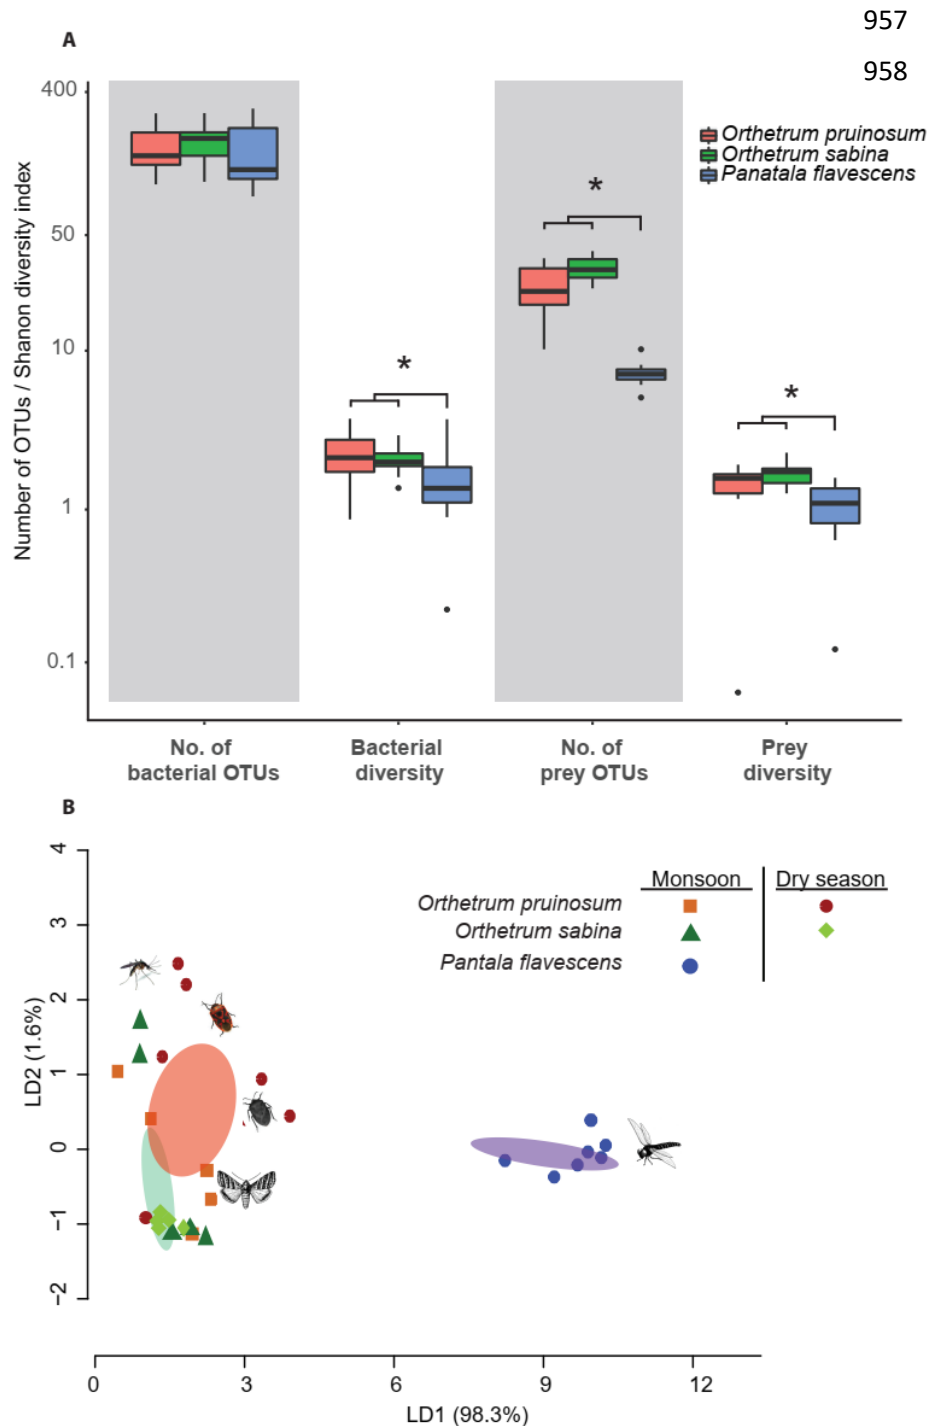



959 **Figure 4.** Boxplots show the proportion of bacteria whose distribution is consistent with (A, B)  
960 neutral assembly (C, D) positive selection and (E, F) negative selection, for dragonflies sampled  
961 from a given location or in a specific season. In panels B, D and F, asterisks indicate a  
962 significant difference across seasons.

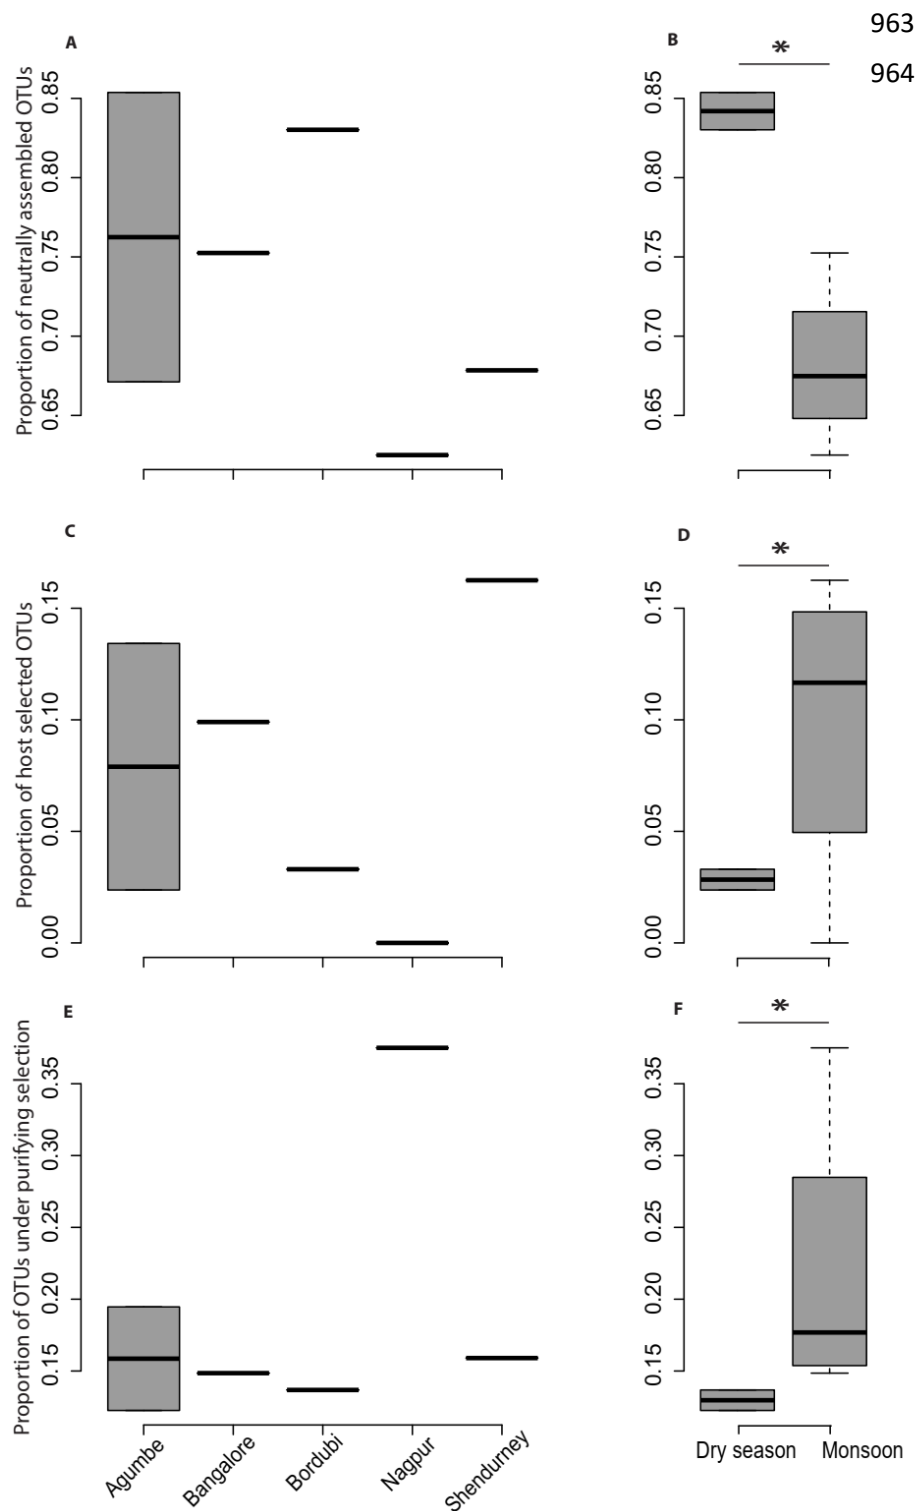

965 **Figure 5:** Examples of Fluorescent in situ hybridization (FISH) images of dragonfly gut sections  
 966 using bacteria-specific probes. Host cell nuclei are stained purple with DAPI; eubacteria are  
 967 green; and *Wolbachia* are pink. Arrows highlight bacteria in each section. (A) Representative  
 968 brightfield image of *P. flavescens* midgut section showing columnar cellular folds covering the  
 969 gut lumen, and food particles in the lumen. (B-D) Foregut sections of *P. flavescens*, *O. sabina*  
 970 and *O. pruinosum*. Note the lack of eubacterial or *Wolbachia* signal. (E-G) Midgut and (H-J)  
 971 hindgut sections of each species, stained with a eubacterial probe. Note the strong eubacterial  
 972 signal near the columnar folds of *P. flavescens*. (K-M) Midgut and (N-P) hindgut sections of  
 973 each species, stained with a *Wolbachia*-specific probe. Note the lack of signal in *P. flavescens*,  
 974 a weak signal in *O. pruinosum*, and a large globular structure with *Wolbachia* in *O. sabina*.

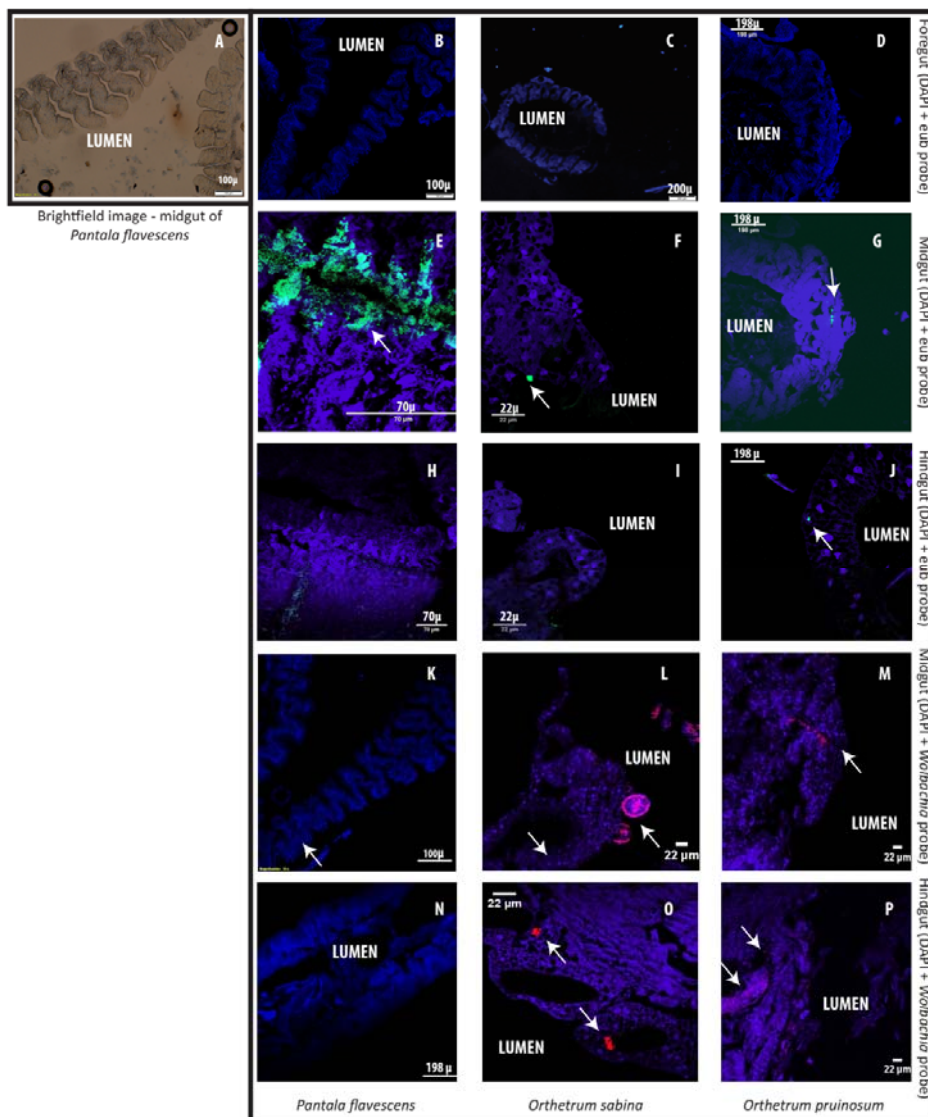

975
